# Supplementary material for: Toxicological and Mutagenic Effects of Particulate Matter from Domestic Activities
Source: MDPI journal article supplement (doi:10.3390/toxics11060505), 2023-06-03
Supplement: s1 [file s1]

# Toxicological and mutagenic effects of particulate matter from domestic activities

## SUPPLEMENTARY I

**Table S1.** List of reagents and consumables used in the study.

| Name                                         | Brand                    | Country |
|----------------------------------------------|--------------------------|---------|
| Quartz fibre filters                         | Pallflex®                | USA     |
| Dimethyl sulfoxide                           | Sigma Aldrich            | USA     |
| Kaighn's Modification of Ham's F-12 Medium   | Gibco, Life Technologies | USA     |
| Fetal Bovine Serum                           | Gibco, Life Technologies | USA     |
| Penicillin-streptomycin                      | Gibco, Life Technologies | USA     |
| Fungizone                                    | Gibco, Life Technologies | USA     |
| CCK-8 Kit                                    | Sigma Aldrich            | USA     |
| Cytotoxicity detection kit                   | Roche Diagnostics GmbH   | Germany |
| 2',7'-dichlorofluorescein diacetate          | Sigma Aldrich            | USA     |
| Ribonuclease A                               | Sigma Aldrich            | USA     |
| Propidium iodide                             | Sigma Aldrich            | USA     |
| <i>Salmonella typhimurium</i> TA100          | Trinova Biochem GmbH     | Germany |
| <i>Salmonella typhimurium</i> TA98           | Trinova Biochem GmbH     | Germany |
| Rat liver microsomal fractions (S9 fraction) | Sigma Aldrich            | USA     |
| 2-Aminoanthracene                            | Sigma Aldrich            | USA     |
| Sodium azide                                 | Acros Organics           | USA     |
| 2-Nitrofluorene                              | Sigma Aldrich            | USA     |

**Table S2.** Equipment used in the study.

| Equipment name                       | Brand/Model                                   | Country |
|--------------------------------------|-----------------------------------------------|---------|
| High-volume air sampler              | MCV, CAV-A/mb                                 | Spain   |
| Automated Solvent Evaporation System | TuboVap II, Biotage                           | Sweden  |
| Microplate reader                    | Biotek®                                       | USA     |
| Attune® Acoustic Focusing Cytometer  | Applied Biosystems, Thermo Fischer Scientific | USA     |

**Table S3.** Software used in the study.

| Name       | Version | Brand         | Country |
|------------|---------|---------------|---------|
| FlowJo     | 10      | FlowJo LLC    | USA     |
| SPSS       | 26      | IBMStatistics | USA     |
| Statistica | 10      | StatSoft®     | USA     |
| Gen5       | 1.11    | Biotek        | USA     |
